# Supplementary figures and images for: MCTP is an ER-resident calcium sensor that stabilizes synaptic transmission and homeostatic plasticity
Source: eLife journal article supplement (doi:10.7554/elife.22904), 2017-05-09

Supplemental Figure 1

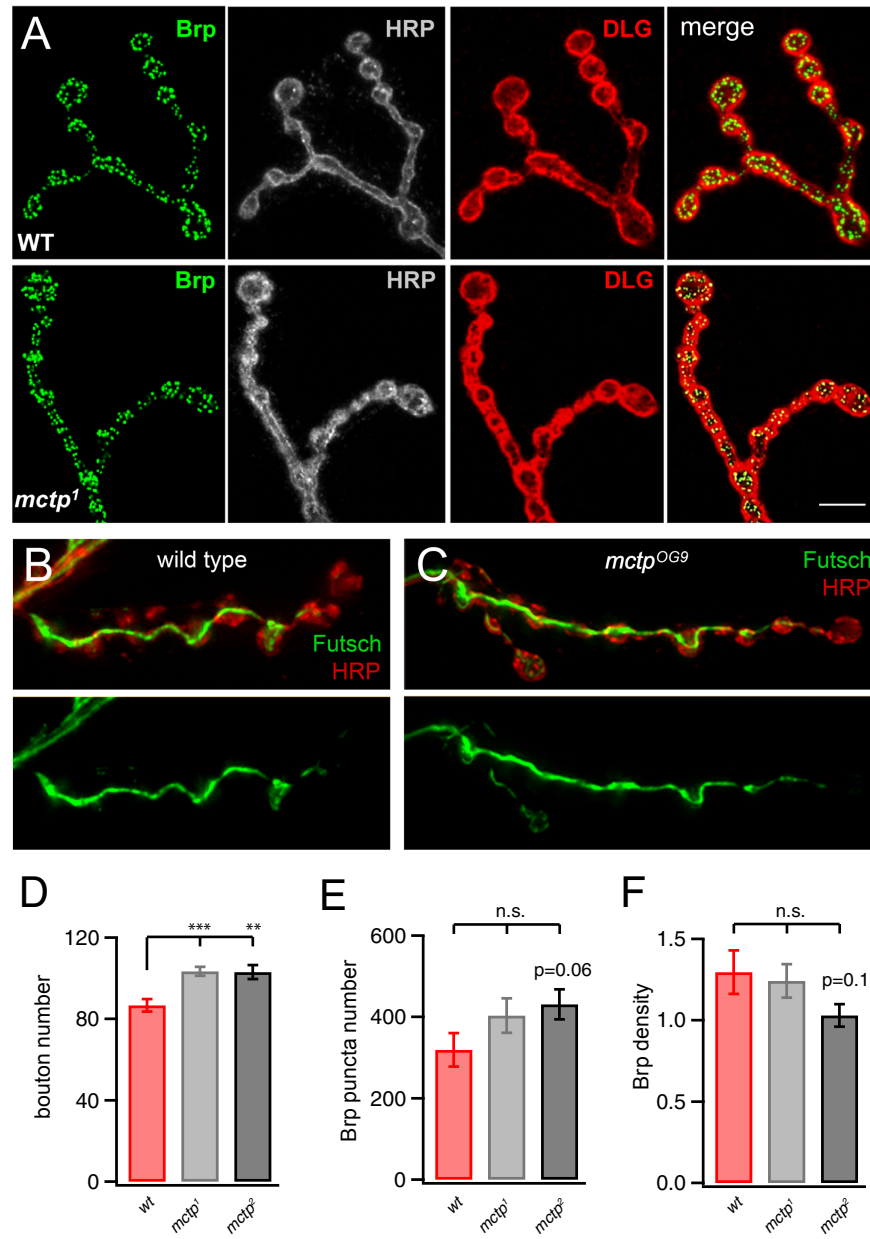

Supplement: supp [file elife-22904-supp-v1.zip]
